# Supplementary material for: A novel near-infrared fluorescent probe for detection of early-stage Aβ protofibrils in Alzheimer's disease
Source: Royal Society of Chemistry journal article supplement (doi:10.1039/c9cc09233a), 2020-01-01
Supplement: c9cc09233a1.pdf [file c9cc09233a1.pdf]

## Electronic Supplementary Information

### **A novel near-infrared fluorescent probe for detection of early-stage A $\beta$ protofibrils in Alzheimer's disease**

Guanglei Lv,<sup>a,c</sup> Anyang Sun,<sup>\*b</sup> Minqi Wang,<sup>b</sup> Peng Wei,<sup>a</sup> Ruohan Li,<sup>a</sup> and Tao Yi<sup>\*a</sup>

<sup>a</sup> Department of Chemistry, Fudan University, Shanghai 200438, P. R. China

<sup>b</sup> Laboratory of Neurodegenerative Diseases and Molecular Imaging, Shanghai University of Medicine & Health Sciences, Shanghai 201318, P. R. China

<sup>c</sup> Key Laboratory of the Ministry of Education for Advanced Catalysis Materials, Zhejiang Normal University, Jinhua 321004, P. R. China

#### **Contents**

1. Materials and general methods
2. Synthesis details of **DCM-AN**
3. The measurement of  $K_d$
4. Preparation of A $\beta$  aggregates and oligomers
5. Computational methods
6. AD transgenic mouse model
7. Colocalization of probe labeling and AD pathology in the transgenic mouse brain
8. Cell viability
9. Additional absorption and fluorescent spectra
10. Working models for theoretical calculations
11. Toxicity of **DCM-AN** and additional brain section images
12. Characteristics of the compounds

## 1. Materials and general methods

All of the starting materials were obtained from commercial suppliers and used as received. Moisture sensitive reactions were performed under an atmosphere of dry argon. 1-(2-Hydroxyphenyl)ethan-1-one and other chemicals were supplied from J&K Scientific Ltd. A $\beta$  (1-42) monomer was purchased from GL Biochem (Shanghai) Ltd. Column chromatography was carried out on silica gel (200–300 mesh).

$^1\text{H}$  NMR (400 MHz) and  $^{13}\text{C}$  NMR (100 MHz) spectra were recorded on a Mercury plus-Varian instrument. Proton chemical shifts are reported in parts per million downfield from tetramethylsilane (TMS). HR-MS was obtained on an LTQ-Orbitrap mass spectrometer (Thermo Fisher, San Jose, CA). UV-visible spectra were recorded on a Shimadzu UV-2550 spectrometer. Steady-state emission experiments at room temperature were measured on an Edinburgh instruments spectrometer (FS-920).

All the *in vivo* experiments were performed in compliance with the relevant laws and institutional guidelines, and the institutional committees of both Fudan University and Shanghai University of Medicine & Health Sciences have approved the experiments.

## 2. Synthesis details of DCM-AN

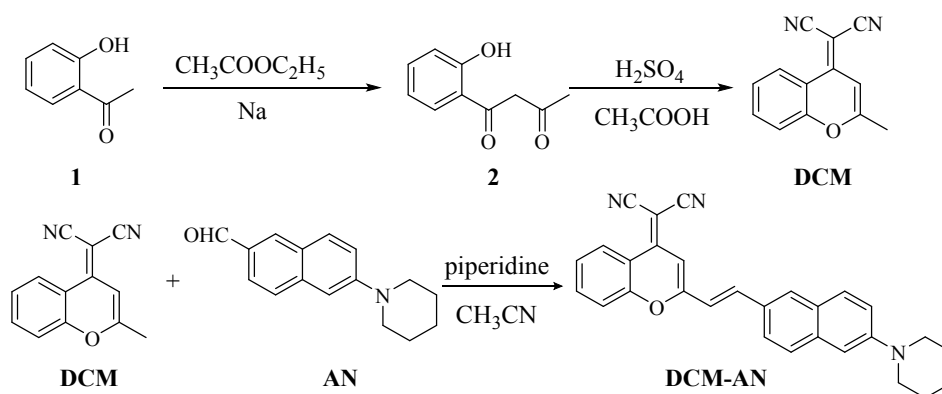

**Scheme S1** The synthetic route of DCM-AN

AN was synthesized according to our previous report.<sup>1</sup>

**Synthesis of DCM.** Compound **1** (5.0 g, 36.5 mmol) was dissolved in 100 mL ethyl acetate (EA), and then sodium (4.0 g, 18.0 mmol) was added in the solution. The grayish-green solid was filtered after violently stirring for 4h at ambient temperature.

The solid was dissolved in 100 mL deionized water, followed by the adjustment of pH of the solution to neutral. The aqueous solution was extracted with 100 mL EA and the organic layer was dried over MgSO<sub>4</sub>, filtered and concentrated to yield the final crude product **2** as a brown solid which was directly used in the next reaction without further purification.

Sulfuric acid (4.6 mL) was slowly added to an AcOH solution (70 mL) containing compound **2**. The mixture was refluxed for about 30 min and then was poured into 800 mL ice water, followed by the adjustment of pH of the solution to neutral with Na<sub>2</sub>CO<sub>3</sub>. The aqueous solution was extracted with methylene dichloride and the organic layer was dried over MgSO<sub>4</sub>, filtered and concentrated to yield the final crude product DCM as an acicular gray solid (85% yield) via flash column chromatography (EtOAc: petroleum ether = 1: 5). <sup>1</sup>H NMR (400 MHz, CD<sub>3</sub>CN) δ = 8.89 (d, J = 8.4 Hz, 1H), 7.72 (t, J = 7.6 Hz, 1H), 7.47 – 7.42 (m, 2H), 6.70 (s, 1H), 2.44 (s, 3H).

**Synthesis of DCM-AN.** To the mixture of DCM (43.7 mg, 0.21 mmol) and AN (54.9 mg, 0.23 mmol) in CH<sub>3</sub>CN, piperidine (2.0 μL, 0.02 mmol) was added and the mixture was stirred at 50 °C under nitrogen for 12 hours. After completion, the crude mixture was concentrated under reduced pressure and the product was obtained via flash column chromatography (EtOAc: petroleum ether = 1: 5) as a dark red solid (83% yield). <sup>1</sup>H NMR (400 MHz, CDCl<sub>3</sub>) δ = 8.87 (d, J = 8.3 Hz, 1H), 7.79 (s, 1H), 7.75 – 7.51 (m, 6H), 7.42 (t, J = 7.7 Hz, 1H), 7.29 (s, 1H), 6.75-6.72 (m, 2H), 5.30 (s, 1H), 3.34 (s, 4H), 1.77-1.66 (m, 6H). <sup>13</sup>C NMR (100 MHz, CDCl<sub>3</sub>) δ = 157.9, 152.7, 152.3, 139.5, 136.0, 134.4, 130.0, 129.5, 127.5, 125.7, 123.6, 119.7, 118.5, 117.8, 117.1, 116.6, 116.0, 114.9, 106.3, 61.7, 50.00 (s), 29.7, 25.5, 24.2. HR-MS (ESI, m/z): calcd for C<sub>29</sub>H<sub>23</sub>N<sub>3</sub>O [M+H]<sup>+</sup>, 430.1919, found 430.1924. FT-IR (cm<sup>-1</sup>): 3352, 2954, 2922, 2852, 2207, 1603.

### 3. The measurement of K<sub>d</sub>

The apparent binding constant (K<sub>d</sub>) of DCM-AN to Aβ protofibril (5 μM) was measured from the double reciprocal of the fluorescence intensity maximum (F<sub>max</sub>) and

the concentration of the probe.<sup>2</sup> The plot is shown in Fig. S1. The  $K_d$  corresponds to the  $-1/(x\text{-intercept})$  of the linear regression.

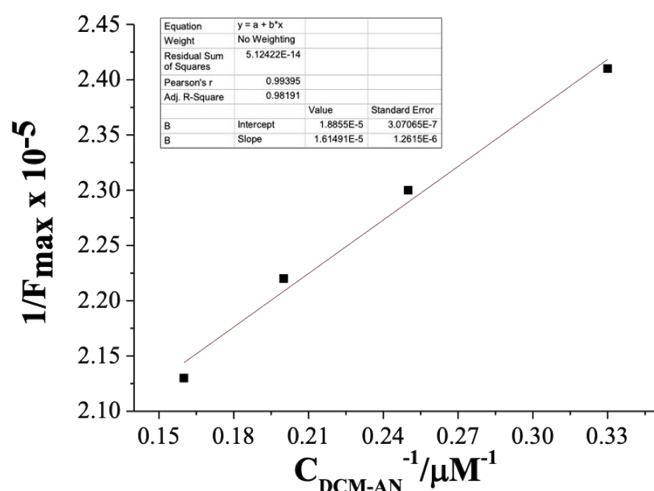

**Fig. S1** Determination of the apparent binding constant ( $K_d$ ) of probe ( $R^2 = 0.98$ ) to A $\beta$  protofibrils,  $\lambda_{ex}=500$  nm.

#### 4. Preparation of A $\beta$ aggregates, oligomer and monomer

The preparation of A $\beta$  species was depicted in our previous work.<sup>1</sup> A $\beta$  monomer was purchased from GL Biochem (Shanghai) Ltd and further purified using HPLC. Purified monomer was stored in hexafluoroisopropanol (HFIP). 10  $\mu$ L of A $\beta$  monomer in HFIP were dried with argon gas and then reconstituted in 1.0 mL of distilled water.<sup>4</sup> This procedure is important for the following measurements.

**Preparation of A $\beta$  oligomers:** the method was referred to Kayed's procedure reported in science (*Science*, 2003, **300**, 486). Briefly, Soluble oligomers were prepared by dissolving 1.0 mg A $\beta$  in 400  $\mu$ L hexafluoroisopropanol (HFIP) for 15 min at room temperature. 100  $\mu$ L of the resulting seedless A $\beta$  solution was added to 900  $\mu$ L dd H $_2$ O in a siliconized Eppendorf tube. After 15 min incubation at room temperature, the samples were centrifuged for 15 min. at 10,000 rpm and the supernatant fraction (pH 2.8-3.5) was transferred to a new siliconized tube and subjected to a gentle stream of N $_2$  for 5-10 min to evaporate the HFIP. The samples were then stirred at 500 rpm using a Teflon coated micro stir bar for 24 h at 22  $^{\circ}$ C.

**Preparation of A $\beta$  aggregates:** Briefly, A $\beta$  (1-42) monomer was dissolved in phosphate buffered saline (PBS, pH = 7.31). This solution was magnetically stirred at

1200 rpm for three days at room temperature. Then pre-aggregated A $\beta$  solution was obtained.

**Preparation of A $\beta$  protofibrils:** This was performed according to Lashuel's reported procedure.<sup>3</sup> Briefly, 1.0 mg A $\beta$  monomer was dissolved in 50  $\mu$ L anhydrous DMSO, and then 800  $\mu$ L ultrapure water was carefully added. After that, 10  $\mu$ L 2M Tris-base solution (pH=7.5) was immediately added and this solution was incubated at room temperature for 5 minutes. The obtained A $\beta$  protofibrils were confirmed by dynamic light scattering (DLS) and TEM (Figure S2).

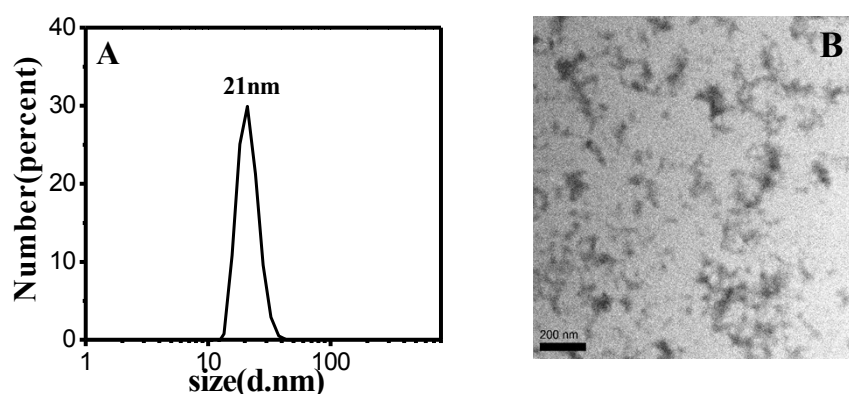

**Fig. S2** A $\beta$  protofibril was measured by DLS (A) and TEM (B, negative staining with PTA).

## 5. Computational Methods

### Quantum mechanical calculations

The geometry optimization for **DCM-AN** molecule was performed by using density functional theory at the B3LYP/6-31G\* level at the gas phase using Gaussian 09 program.<sup>8</sup>

### Molecular docking search

**DCM-AN** docking searches with A $\beta$  trimer and twelve A $\beta$  monomers (named twelve polymer) were executed by using Autodock vina1.1.2 software package. The docking simulations were carried out with a box centered on the A $\beta$  and employing 50  $\times$  50  $\times$  50 grid points. X-ray RCSB database (PDB ID: 4NTR<sup>9</sup> and 2MXU<sup>10</sup>) determined for trimer and twelve polymer of  $\beta$ -amyloid peptide were employed for structure models of A $\beta$  oligomer and toxic A $\beta$  protofibrils, respectively. In addition,

two other A $\beta$  structures (PDB ID: 5KK3<sup>11</sup> and 2LMP<sup>12</sup>) which were more complicated than 4NTR and 2MXU, were chosen as working models for A $\beta$  aggregates.

### **Molecular dynamics (MD) simulations**

We performed all-atom, explicit-water MD simulations using NAMD soft package in Charmm force field.<sup>13</sup> Cl ions were added to keep system neutral and a TIP3P periodic water box was added, 9208 water molecules were added into the system. Then a 1000 steps energy minimization was carry out at 298 K, 1 BAR condition. Finally, MD simulation runs at the same temperature and pressure. Other parameters were the default value of the software.

## **6. AD transgenic mouse model**

A triple transgenic model for Alzheimer's disease was used to examine the possible co-localization of **DCM-AN** probe staining with A $\beta$  or tau immunoreactivity. The triple transgenic mice were generated by crossing 5XFAD transgenic mice with the tau P301S single transgenic mice. The 5XFAD transgenic mice<sup>5</sup> and P301S tau transgenic mice<sup>6</sup> were obtained from the Jackson Laboratory (Bar Harbor, Maine, USA). To maintain on a C57BL/6J background, the original 5XFAD mice were backcrossed to C57BL/6J mice for eight generations. These 5XFAD transgenic mice overexpress both mutant human APP (695) with the Swedish (K670N, M671L), Florida (I716V), and London (V717I) familial Alzheimer's disease (FAD) mutations and human PS1 harboring two FAD mutations, M146L and L286V. Expression of two transgenes is regulated by neural-specific elements of the mouse Thy1 promoter. Mutant tau transgenic mice express the P301S mutant form of human microtubule-associated protein tau with one N-terminal insert and four microtubule binding repeats, under control of the mouse prion promoter. Mice were genotyped by PCR as described previously. Male or female mice at age of 4-15 month-old were used in this study.<sup>7</sup> Animals were handled in accordance with the NIH Guidelines for the Care and Use of Laboratory Animals.

## **7. Colocalization of probe labeling and AD pathology in the transgenic mouse brain**

The brain tissue and immunofluorescent labeling were performed as previously described.<sup>7</sup> Mice were deeply anesthetized and transcardially perfused with PBS, followed by 8% formaldehyde (Sigma-Aldrich) in PBS (pH = 7.4). The brains were post-fixed and frozen-sectioned (14  $\mu$ m thickness) with a microtome (Leica Microsystems, GmbH, Wetzlar, Germany) for further analyses. Briefly, free-floating sections were blocked in a blocking solution containing 10% goat serum, 1% BSA and 0.4% Triton X-100. Incubation with primary antibodies took place overnight at 4 °C. Then, one of following antibodies was employed each for colocalization studies:  $\beta$ -Amyloid oligomer-specific monoclonal antibody (Agrisera, Sweden),  $\beta$ -Amyloid monoclonal antibody (Sigma-Aldrich), A $\beta$ 40 and A $\beta$ 42 polyclonal antibodies (Cell Signaling), or conformation-dependent tau antibody MC1 (Peter Davies), at dilutions from 1:400 to 1:100. After rinsing, sections were incubated in the solution of goat anti-mouse or goat anti-rabbit secondary antibody conjugated with Alexa 488 (Molecular Probes, Carlsbad, CA, USA) for 2 h at room temperature. The images for A $\beta$  or tau immunofluorescent reactivity followed by **DCM-AN** probe (40  $\mu$ M) for A $\beta$  antibody were taken sequentially using a microscope (BX51, Olympus, Japan) equipped with a DP72 digital camera.

## **8. Cell viability**

The cytotoxicity was performed by 3-(4,5-dimethylthiazol-2-yl) -2,5-diphenyltetrazolium bromide (MTT) assay with RAW cell lines. Cells growing in log phase were planted into a 96-well cell culture plate at  $1 \times 10^5$ / well. The cells were incubated for 12 h at 37 °C under 5% CO<sub>2</sub> in an incubator. A solution of **DCM-AN** (100.0  $\mu$ L/well) at concentrations of 1.0, 2.5, 5.0, 10.0, 25.0, 50.0, 100.0  $\mu$ M in nutrient with 10% DMSO was added to the wells of the treatment group, respectively. The cells were subsequently incubated for 12 h and 36 h at 37 °C under 5% CO<sub>2</sub>. Thereafter, MTT (0.5 mg/mL) was added to each well and the plate was incubated for an additional 4 h at 37 °C under 5% CO<sub>2</sub>. The optical density OD490 value (Abs.) of each well was measured by means of a Tecan Infinite M200 monochromator-based multifunction microplate reader, which was used as cell viability.

## 9. Additional absorption and fluorescent spectra

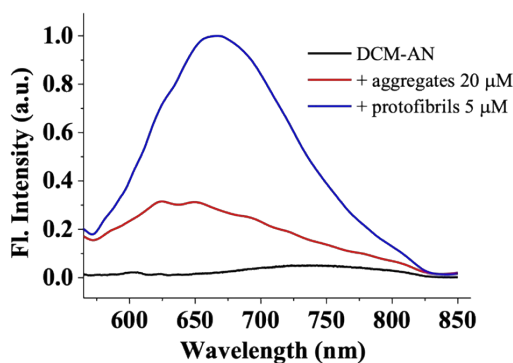

**Fig. S3** Fluorescence spectrum of **DCM-AN** (2.0 μM) with Aβ protofibrils (5.0 μM) and Aβ aggregates (20.0 μM),  $\lambda_{\text{ex}}=500$  nm.

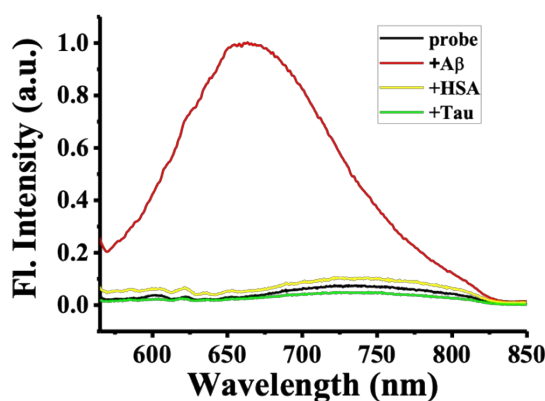

**Fig. S4** Fluorescence spectra of **DCM-AN** (2.0 μM) with HSA (5.0 μM) and tau protein (5.0 μM),  $\lambda_{\text{ex}}=500$  nm.

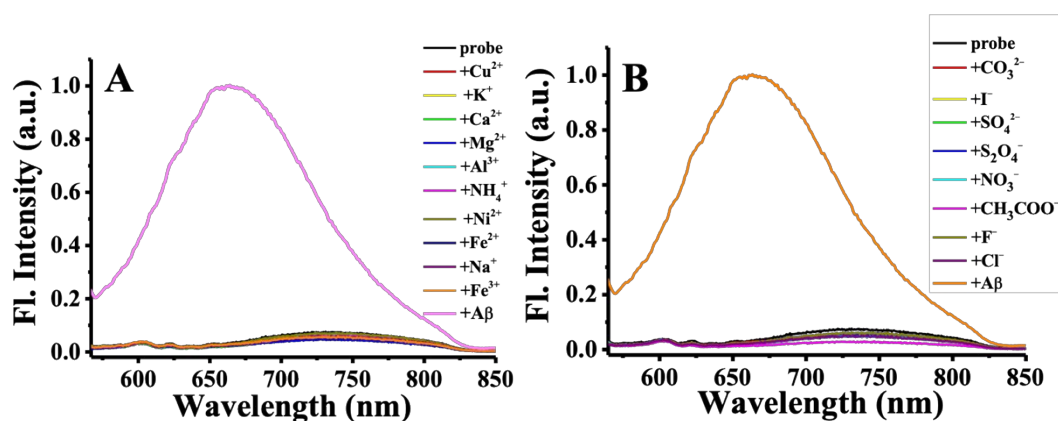

**Fig. S5** Fluorescence spectra of **DCM-AN** (2.0 μM) with a series of cations (5.0 μM) including Cu<sup>2+</sup>, K<sup>+</sup>, Ca<sup>2+</sup>, Mg<sup>2+</sup>, Al<sup>3+</sup>, NH<sub>4</sub><sup>+</sup>, Ni<sup>2+</sup>, Fe<sup>2+</sup>, Na<sup>+</sup>, and Fe<sup>3+</sup>, and anions (5.0 μM) including CO<sub>3</sub><sup>2-</sup>, I<sup>-</sup>, SO<sub>4</sub><sup>2-</sup>, S<sub>2</sub>O<sub>4</sub><sup>-</sup>, NO<sub>3</sub><sup>-</sup>, CH<sub>3</sub>COO<sup>-</sup>, F<sup>-</sup>, and Cl<sup>-</sup>,  $\lambda_{\text{ex}}=500$  nm.



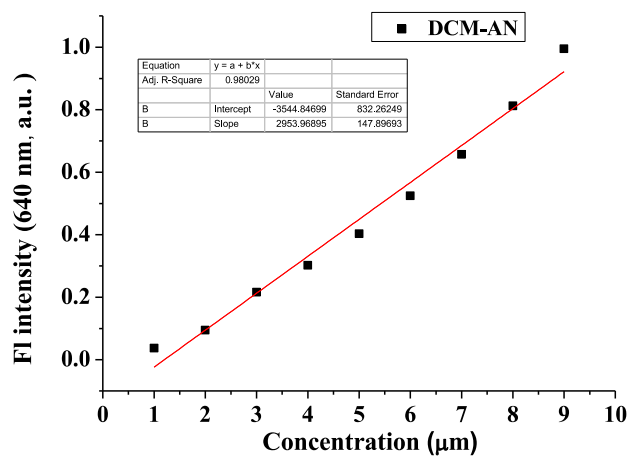

**Fig. S6** The linear relationship of fluorescence intensity at 661 nm and the concentration of A $\beta$  protofibrils.  $\lambda_{\text{ex}}=500$  nm

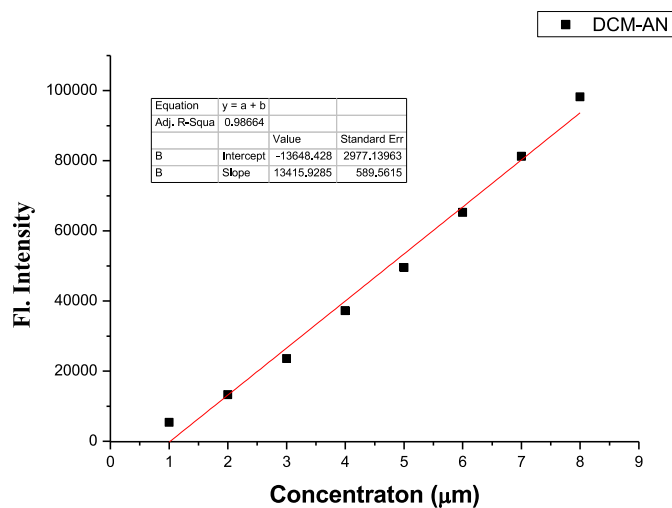

**Fig. S7** The detection limit was calculated with  $3\sigma/k$ , where  $\sigma$  is the standard deviation of blank measurement and  $k$  is the slope in this figure.  $\lambda_{\text{ex}}=500$  nm

## 10. Working models for theoretical calculations

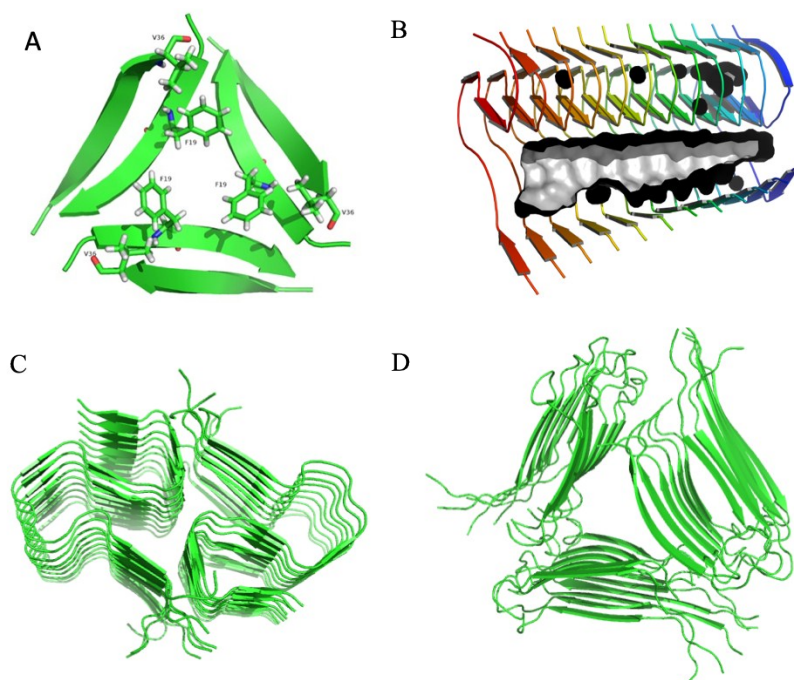

**Fig. S8** Working models for (A) A $\beta$  trimer, (B) A $\beta$  twelve polymer, (C and D) A $\beta$  aggregates.

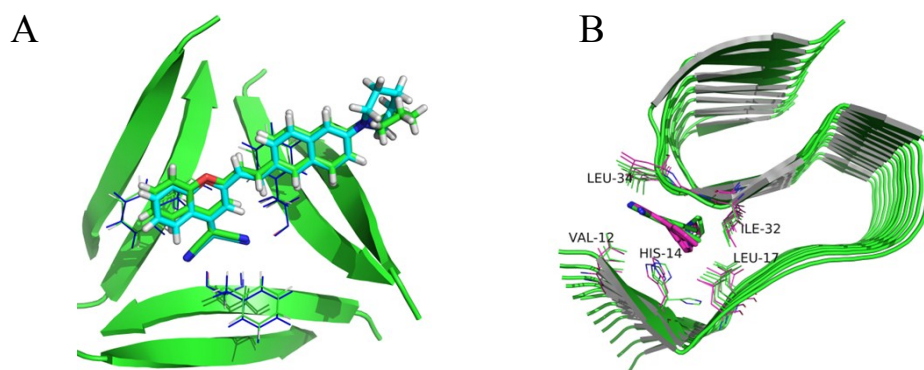

**Fig. S9** The Molecular dynamics simulations of **DCM-AN** with (A) A $\beta$  trimer and (B) A $\beta$  twelve polymer.

**Table S1** SASA shrinks before and after binding with two working models

|                      | Before binding           | After binding            | Shrink ( $\Delta$ SASA) |
|----------------------|--------------------------|--------------------------|-------------------------|
| Twelve-polymer       | 15300.857 Å <sup>2</sup> | 15159.366 Å <sup>2</sup> | 141.491 Å <sup>2</sup>  |
| Trimer               | 24703.236 Å <sup>2</sup> | 24572.652 Å <sup>2</sup> | 130.584 Å <sup>2</sup>  |
| Aggregates Fig. S4 C | 18634.187 Å <sup>2</sup> | 18628.119 Å <sup>2</sup> | 6.068 Å <sup>2</sup>    |
| Aggregates Fig. S4 D | 28305.437 Å <sup>2</sup> | 28288.730 Å <sup>2</sup> | 16.707 Å <sup>2</sup>   |

## 11. Toxicity of DCM-AN and additional brain section images

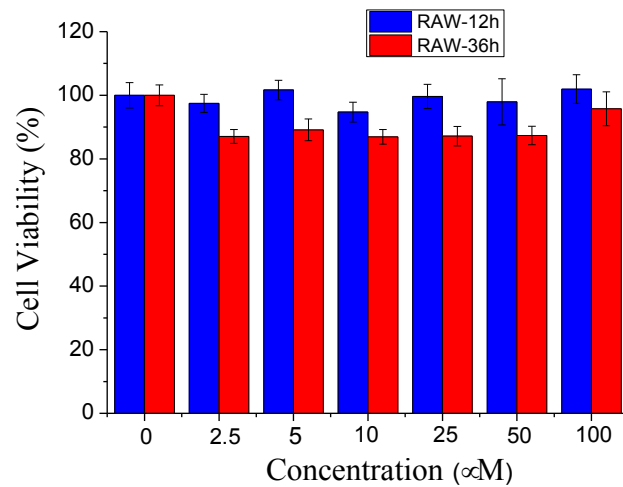

**Fig. S10** Cell viability values (%) estimated by MTT assay RAW cells, which were cultured in the presence of 0-100 µM DCM-AN for 12 h and 36 h at 37 °C.

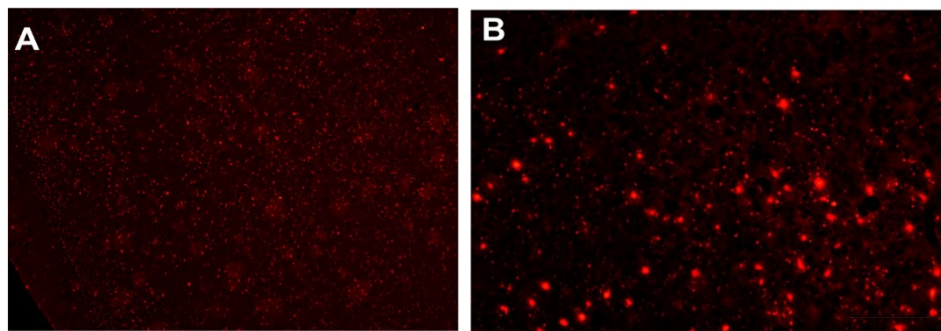

**Fig. S11** The fluorescent images of DCM-AN *in vitro* labeling on brain sections from an AD transgenic mouse model. A: negative control without DCM-AN labeling; B: DCM-AN (0.1 µM) *in vitro* labeling. Scale bar: 200 µm.

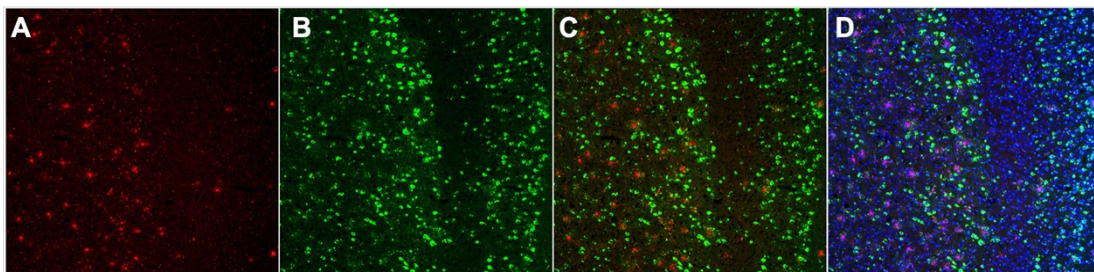

**Fig. S12** Colocalization of DCM-AN labeling with pathological tau antibody immunostaining was examined in the brain sections of triple transgenic mice for AD. (A) DCM-AN staining; (B) MC1 immunostaining for pathological conformation of tau; (C) the merged images; (D) the merged image counter-stained with DAPI. Scale bar: 100 µm.

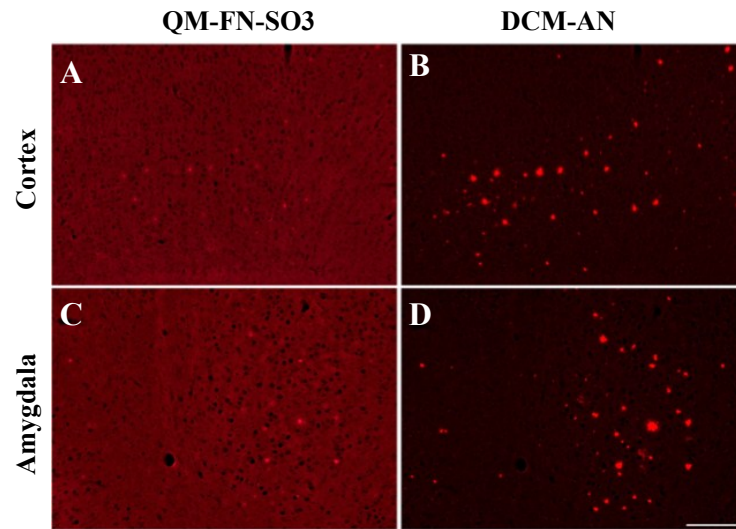

**Fig. S13** Capability of **DCM-AN** in detecting early A $\beta$  pathology as compared with that of a A $\beta$  aggregate probe QM-FN-SO3. A and C were stained with QM-FN-SO3; B and D were stained with DCM-AN. A and B were from cortex; C and D were from amygdala. The brain sections from 4-month-old APP/PS1 transgenic mice were used for this comparative study. Scale bar: 200  $\mu$ m.

## 12. Characteristic of the compounds

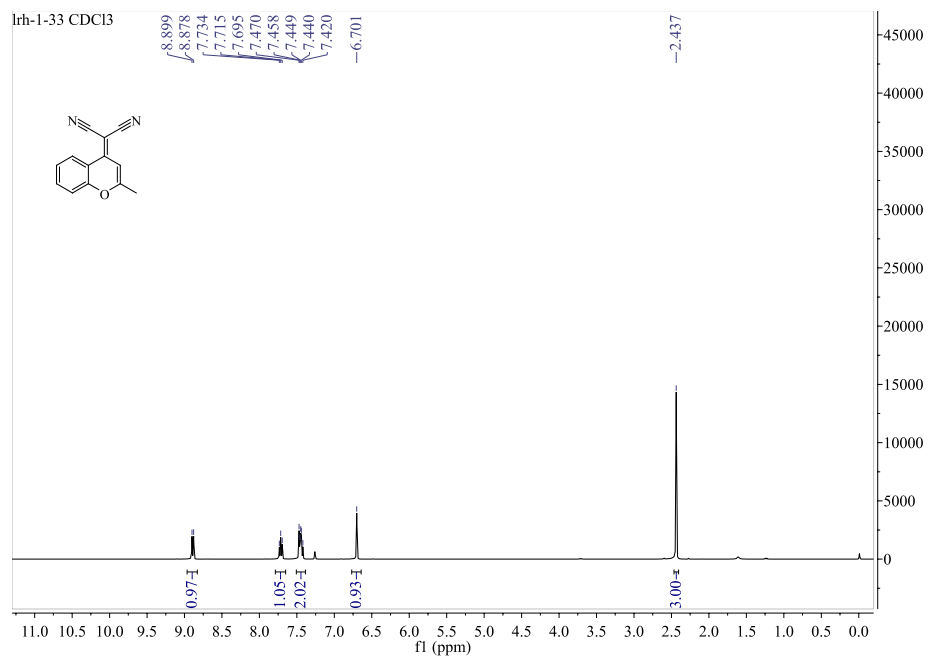

**Fig. S14** The <sup>1</sup>H NMR spectrum of DCM (400 MHz, CD<sub>3</sub>Cl).

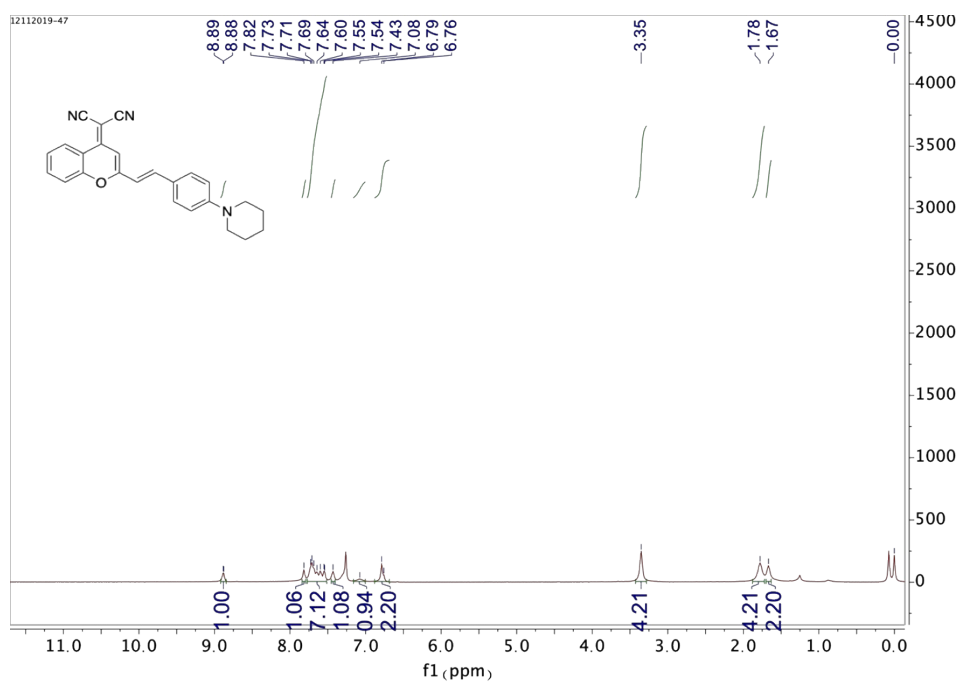

**Fig. S15** The <sup>1</sup>H NMR spectrum of DCM-AN (400 MHz, CD<sub>3</sub>Cl).

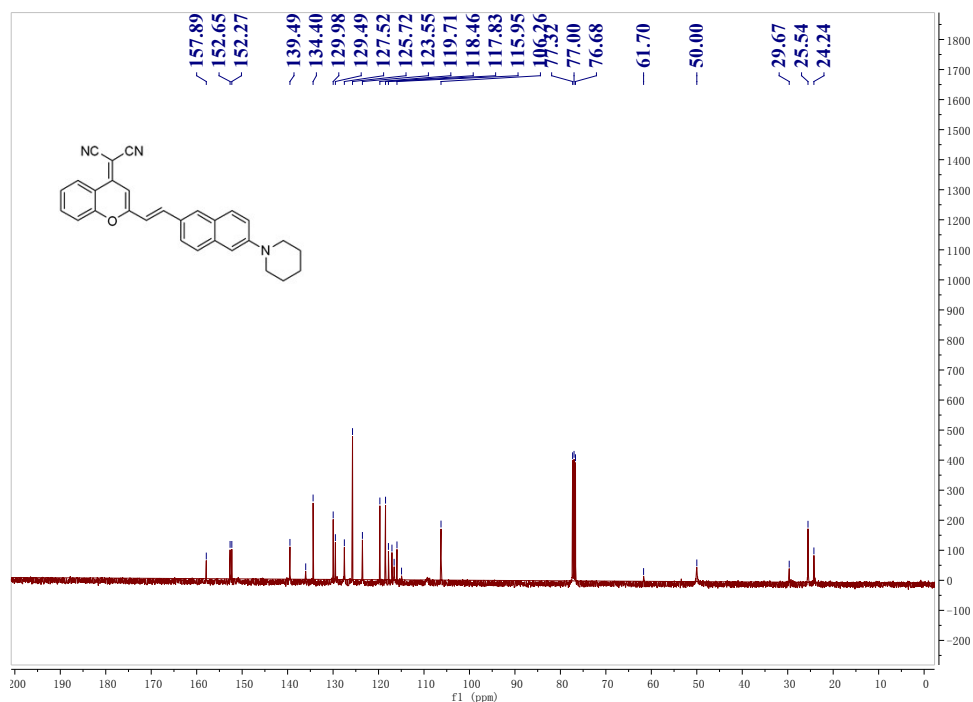

**Fig. S16** The  $^{13}\text{C}$  NMR spectrum of **DCM-AN** (100MHz,  $\text{CDCl}_3$ ).

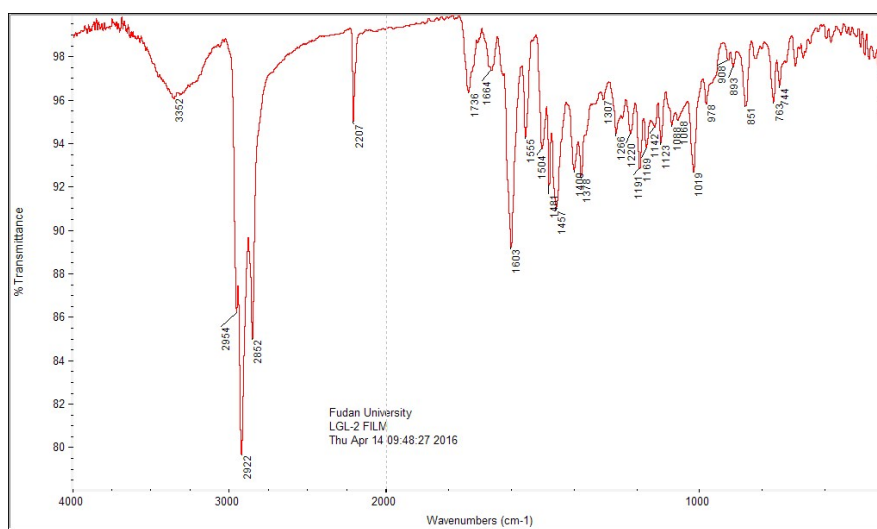

**Fig. S17** The IR of **DCM-AN**. FT-IR ( $\text{cm}^{-1}$ ): 2925  $\text{cm}^{-1}$  (asymmetrical stretching vibration of  $\text{CH}_2$ ,  $\nu_{\text{asCH}_2}$ ); 2850  $\text{cm}^{-1}$  (symmetrical stretching vibration of  $\text{CH}_2$ ,  $\nu_{\text{sCH}_2}$ ); 2207  $\text{cm}^{-1}$  (stretching vibration of  $\text{CN}$ ,  $\nu_{\text{CN}}$ ); 1603  $\text{cm}^{-1}$  (stretching vibration of  $\text{C}=\text{C}$ ,  $\nu_{\text{C}=\text{C}}$ ); 1266  $\text{cm}^{-1}$  (stretching vibration of  $\text{C}-\text{N}$ ,  $\nu_{\text{C}-\text{N}}$ ); 1019  $\text{cm}^{-1}$  (symmetrical stretching vibration of  $\text{C}-\text{O}-\text{C}$ ,  $\nu_{\text{asC}-\text{O}-\text{C}}$ ).

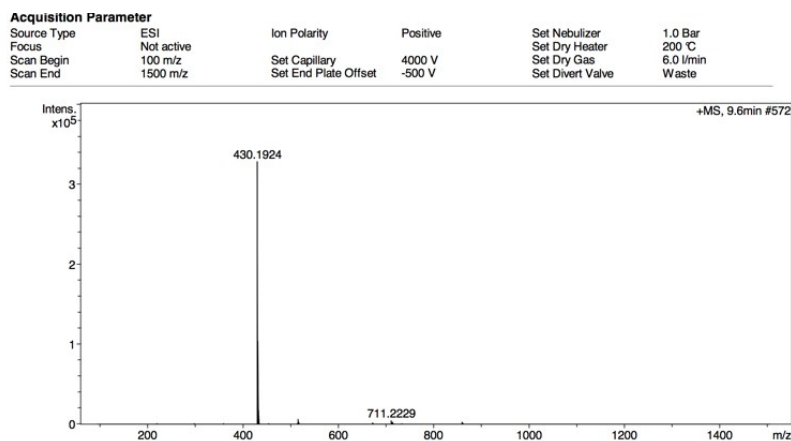

**Fig. S18** The HRMS of DCM-AN.

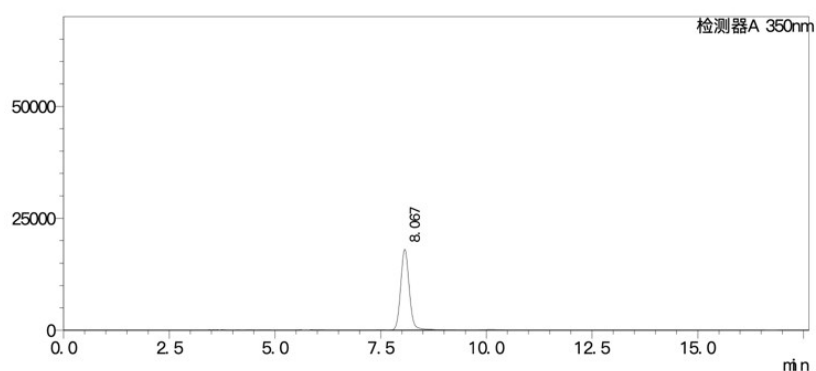

**Fig. S19** The HPLC of DCM-AN (mobile phase: acetonitrile, flow rate: 1.0 mL/min, detection wavelength: 350 nm).

## Reference

1. G. Lv, B. Cui, H. Lan, Y. Wen, A. Sun and T. Yi, *Chem Commun.*, 2015, **51**, 125.
2. J. Sutharsan, M. Dakanali, C. C. Capule, M. A. Haidekker, J. Yang and E. A. Theodorakis, *ChemMedChem*, 2010, **5**, 56.
3. A. Jan, D. M. Hartley and H. A. Lashuel, *Nat. Protoc.*, 2010, **5**, 1186.
4. X. Zhang, Y. Tian, Z. Li, X. Tian, H. Sun, H. Liu, A. Moore and C. Ran, *J. Am. Chem. Soc.*, 2013, **135**, 16397.
5. H. Oakley, S. L. Cole, S. Logan, E. Maus, P. Shao, J. Craft, A. Guillozet-Bongaarts, M. Ohno, J. Disterhoft, L. Van Eldik, R. Berry and R. Vassar, *J. Neurosci.*, 2006, **26**, 10129.
6. Y. Yoshiyama, M. Higuchi, B. Zhang, S.-M. Huang, N. Iwata, T. C. Saido, J.

- Maeda, T. Suhara, J. Q. Trojanowski and V. M. Y. Lee, *Neuron*, 2007, **53**, 337.
7. Q. Zhang, X. Zhang and A. Sun, *Acta Neuropathol.*, 2009, **117**, 687.
  8. A. D. Becke, *J. Chem. Phys.*, 1993, **98**, 1372.
  9. R. K. Spencer, H. Li and J. S. Nowick, *J. Am. Chem. Soc.*, 2014, **136**, 5595.
  10. Y. Xiao, B. Ma, D. McElheny, S. Parthasarathy, F. Long, M. Hoshi, R. Nussinov and Y. Ishii, *Nat. Struct. Mol. Biol.*, 2015, **22**, 499.
  11. M. T. Colvin, R. Silvers, Q. Z. Ni, T. V. Can, I. Sergeyev, M. Rosay, K. J. Donovan, B. Michael, J. Wall, S. Linse and R. G. Griffin, *J. Am. Chem. Soc.*, 2016, **138**, 9663.
  12. A. K. Paravastu, R. D. Leapman, W.-M. Yau and R. Tycko, *Proc. Natl. Acad. Sci. U. S. A.*, 2008, **105**, 18349.
  13. W. J. Menz, M. J. Penna and M. J. Biggs, *Comput. Phys. Commun.*, 2010, **181**, 2082.
